# Supplementary material
Source: publisher figshare collection journal article supplement (https://asha.figshare.com/ndownloader/files/37419235)
Supplement: Supplementary file [file 37419235]

# **Supplemental Material S1. Pearson product moment correlations between vocal measures by sample length.**

## ***Pearson Product Moment Correlations Between Vocal Measures for 1-Minute Samples***

| Vocal measure | 1.   | 2.    | 3.    | 4.    | 5.    | 6.    |
|---------------|------|-------|-------|-------|-------|-------|
| 1. TV         |      | .38*  | .19   | .86** | .34   | .35   |
| 2. CV         | .39* |       | .93** | .35   | .85** | .71** |
| 3. PCV        | -.09 | .77** |       | .17   | .68** | .44*  |
| 4. CI         | .42* | .26   | -.06  |       | .46** | .49** |
| 5. DKCC       | .23  | .66** | .34   | .42*  |       | .87** |
| 6. WA         | .17  | .05   | -.09  | .62** | .31   |       |

*Note.* Values below the diagonal are from 1-minute samples from the beginning of the sample. Values above the diagonal are from 1-minute samples from the midpoint of the sample. CI = consonant inventory; CV = communicative vocalizations; DKCC = diversity of key consonants used in communication acts (Wetherby et al., 2007; Woynaroski et al., 2017); PCV = proportion of communicative vocalizations; TV = total vocalizations; WA = word approximations.

\* $p < .05$ . \*\* $p < .01$ .

## ***Pearson Product Moment Correlations Between Vocal Measures for 3-Minute Samples***

| Vocal measure | 1.    | 2.    | 3.    | 4.    | 5.    | 6.    |
|---------------|-------|-------|-------|-------|-------|-------|
| 1. TV         |       | .47** | .25   | .78** | .42*  | .33   |
| 2. CV         | .47** |       | .94** | .37*  | .87** | .87** |
| 3. PCV        | -.21  | .56** |       | .21   | .77** | .82** |
| 4. CI         | .76** | .72** | .20   |       | .44*  | .33   |
| 5. DKCC       | .42*  | .79** | .43*  | .74** |       | .82** |
| 6. WA         | .56** | .84** | .28   | .65** | .68** |       |

*Note.* Values below the diagonal are from 3-minute samples from the beginning of the sample. Values above the diagonal are from 3-minute samples from the midpoint of the sample. CI = consonant inventory; CV = communicative vocalizations; DKCC = diversity of key consonants used in communication acts (Wetherby et al., 2007; Woynaroski et al., 2017); PCV = proportion of communicative vocalizations; TV = total vocalizations; WA = word approximations.

\* $p < .05$ . \*\* $p < .01$ .

## ***Pearson Product Moment Correlations Between Vocal Measures for 7-Minute Samples***

| Vocal measure | 1.    | 2.    | 3.    | 4.    | 5.    | 6.    |
|---------------|-------|-------|-------|-------|-------|-------|
| 1. TV         |       | .58** | .02   | .76** | .69** | .46*  |
| 2. CV         | .47** |       | .70** | .49** | .75** | .88** |
| 3. PCV        | -.13  | .60** |       | .09   | .44*  | .58** |
| 4. CI         | .70** | .55** | .11   |       | .80** | .53** |
| 5. DKCC       | .52** | .84** | .49** | .65** |       | .71** |
| 6. WA         | .47** | .91** | .44*  | .58** | .90** |       |

*Note.* Values below the diagonal are from 7-minute samples from the beginning of the sample. Values above the diagonal are from 7-minute samples from the midpoint of the sample. CI = consonant inventory; CV = communicative vocalizations; DKCC = diversity of key consonants used in communication acts (Wetherby et al., 2007; Woynaroski et al., 2017); PCV = proportion of communicative vocalizations; TV = total vocalizations; WA = word approximations.

\* $p < .05$ . \*\* $p < .01$ .

***Pearson Product Moment Correlations Between Vocal Measures for 10-Minute Samples***

| Vocal measure | 1.    | 2.    | 3.    | 4.    | 5.    | 6.    |
|---------------|-------|-------|-------|-------|-------|-------|
| 1. TV         |       | .71** | -.15  | .71** | .71** | .55** |
| 2. CV         | .55** |       | .44*  | .41*  | .73** | .82** |
| 3. PCV        | -.02  | .61** |       | -.17  | .23   | .36   |
| 4. CI         | .72** | .47** | .07   |       | .72** | .55** |
| 5. DKCC       | .59** | .79** | .45*  | .67** |       | .74** |
| 6. WA         | .57** | .93** | .48** | .53** | .85** |       |

*Note.* Values below the diagonal are from 10-minute samples from the beginning of the sample. Values above the diagonal are from 10-minute samples from the midpoint of the sample. CI = consonant inventory; CV = communicative vocalizations; DKCC = diversity of key consonants used in communication acts (Wetherby et al., 2007; Woynaroski et al., 2017); PCV = proportion of communicative vocalizations; TV = total vocalizations; WA = word approximations.

\* $p < .05$ . \*\* $p < .01$ .

***Pearson Product Moment Correlations Between Vocal Measures for 20-Minute Samples from the Beginning of the Sample***

| Vocal measure | 1.    | 2.    | 3.    | 4.    | 5.    | 6. |
|---------------|-------|-------|-------|-------|-------|----|
| 1. TV         |       |       |       |       |       |    |
| 2. CV         | .54** |       |       |       |       |    |
| 3. PCV        | .07   | .73** |       |       |       |    |
| 4. CI         | .70** | .38*  | .09   |       |       |    |
| 5. DKCC       | .68** | .62** | .39*  | .77** |       |    |
| 6. WA         | .51** | .94** | .64** | .41*  | .67** |    |

*Note.* CI = consonant inventory; CV = communicative vocalizations; DKCC = diversity of key consonants used in communication acts (Wetherby et al., 2007; Woynaroski et al., 2017); PCV = proportion of communicative vocalizations; TV = total vocalizations; WA = word approximations.

\* $p < .05$ . \*\* $p < .01$ .

***Pearson Product Moment Correlations Between Vocal Measures for the Full Communication Complexity Scale Sample***

| Vocal measure | 1.    | 2.    | 3.    | 4.    | 5.    | 6. |
|---------------|-------|-------|-------|-------|-------|----|
| 1. TV         |       |       |       |       |       |    |
| 2. CV         | .56** |       |       |       |       |    |
| 3. PCV        | .00   | .71** |       |       |       |    |
| 4. CI         | .64** | .43*  | .10   |       |       |    |
| 5. DKCC       | .62** | .66** | .43*  | .79** |       |    |
| 6. WA         | .50** | .91** | .59** | .51** | .69** |    |

*Note.* CI = consonant inventory; CV = communicative vocalizations; DKCC = diversity of key consonants used in communication acts (Wetherby et al., 2007; Woynaroski et al., 2017); PCV = proportion of communicative vocalizations; TV = total vocalizations; WA = word approximations.

\* $p < .05$ . \*\* $p < .01$ .

**References**

- Wetherby, A. M., Watt, N., Morgan, L., & Shumway, S. (2007). Social communication profiles of children with autism spectrum disorders late in the second year of life. *Journal of Autism and Developmental Disorders*, 37(5), 960–975. <https://doi.org/10.1007/s10803-006-0237-4>
- Woynaroski, T., Oller, D. K., Keceli-Kaysili, B., Xu, D., Richards, J. A., Gilkerson, J., Gray, S., & Yoder, P. (2017). The stability and validity of automated vocal analysis in preverbal preschoolers with autism spectrum disorder. *Autism Research*, 10(3), 508–519. <https://doi.org/10.1002/aur.1667>
